# Supplementary material for: Abrupt shifts of the Sahara–Sahel boundary during Heinrich stadials
Source: Copernicus journal article supplement (doi:10.5194/cp-9-1181-2013), 2013-05-29
Supplement: Supplementary file 1 [file cp-9-1181-2013-supplement.pdf]

**Supplementary Table 1: Major-element composition of the dust, river and marine end-members.**

| <b>Dust end-member: Sahara-Sahel dust and soils</b> |                  |              |               |              |               |               |               |                          |                 |
|-----------------------------------------------------|------------------|--------------|---------------|--------------|---------------|---------------|---------------|--------------------------|-----------------|
| <b>Latitude</b>                                     | <b>Longitude</b> | <b>Al(%)</b> | <b>Si (%)</b> | <b>K (%)</b> | <b>Ca (%)</b> | <b>Ti (%)</b> | <b>Fe (%)</b> | <b>Reference</b>         | <b>Material</b> |
| 27° 50.00' N                                        | 12° 53.00' W     | 11.1         | 55.0          | 3.8          | 21.9          | 0.9           | 7.3           | (Moreno et al., 2006)    | Soil            |
| 27° 02.00' N                                        | 13° 05.00' W     | 8.9          | 52.0          | 3.3          | 30.4          | 0.6           | 4.7           | (Moreno et al., 2006)    | Soil            |
| 26° 37.00' N                                        | 13° 03.00' E     | 6.3          | 62.3          | 2.6          | 20.5          | 1.3           | 6.9           | (Moreno et al., 2006)    | Soil            |
| 25° 30.00' N                                        | 05° 00.00' E     | 16.2         | 63.5          | 3.9          | 4.6           | 1.7           | 10.1          | (Guieu and Thomas, 1996) | Soil            |
| 25° 30.00' N                                        | 05° 00.00' E     | 15.2         | 67.3          | 5.0          | 3.7           | 1.1           | 7.8           | (Guieu and Thomas, 1996) | Soil            |
| 22° 55.00' N                                        | 5° 29.00' E      | 17.1         | 63.5          | 4.5          | 3.8           | 1.8           | 9.3           | (Moreno et al., 2006)    | Soil            |
| 22° 47.00' N                                        | 5° 32.00' E      | 16.3         | 66.1          | 4.6          | 3.2           | 1.7           | 8.2           | (Moreno et al., 2006)    | Soil            |
| 17° 45.00' N                                        | 17° 48.00' E     | 16.6         | 66.5          | 2.7          | 2.2           | 1.4           | 10.6          | (Moreno et al., 2006)    | Soil            |
| 16° 37.00' N                                        | 15° 02.00' W     | 11.7         | 76.2          | 1.9          | 1.3           | 1.2           | 7.7           | (Orange and Gac, 1990)   | Aerosol Dust    |
| 16° 37.00' N                                        | 15° 02.00' W     | 12.1         | 75.7          | 2.0          | 1.0           | 1.2           | 7.9           | (Orange et al., 1993)    | Aerosol Dust    |
| 16° 37.00' N                                        | 15° 02.00' W     | 11.0         | 76.9          | 1.8          | 1.7           | 1.1           | 7.4           | (Orange et al., 1993)    | Aerosol Dust    |
| 15° 00.00' N                                        | 10° 00.00' E     | 13.6         | 72.5          | 2.8          | 2.2           | 1.5           | 7.3           | (Moreno et al., 2006)    | Aerosol Dust    |
| 14° 69.00' N                                        | 17° 45.00' W     | 13.7         | 71.1          | 3.7          | 3.0           | 1.2           | 7.3           | (Orange et al., 1993)    | Aerosol Dust    |
| 14° 69.00' N                                        | 17° 45.00' W     | 14.2         | 70.2          | 3.8          | 3.1           | 1.2           | 7.4           | (Orange et al., 1993)    | Aerosol Dust    |
| 14° 69.00' N                                        | 17° 45.00' W     | 12.5         | 72.3          | 2.7          | 3.1           | 1.1           | 8.3           | (Orange et al., 1993)    | Aerosol Dust    |
| 14° 69.00' N                                        | 17° 45.00' W     | 10.7         | 74.3          | 1.8          | 3.7           | 1.0           | 8.5           | (Orange et al., 1993)    | Aerosol Dust    |
| 14° 41.57' N                                        | 17° 36.80' W     | 12.2         | 73.8          | 4.2          | 3.4           | 0.9           | 5.6           | (Orange and Gac, 1990)   | Aerosol Dust    |
| 14° 25.00' N                                        | 16° 58.00' W     | 11.8         | 75.6          | 1.9          | 1.5           | 1.1           | 8.1           | (Orange et al., 1993)    | Aerosol Dust    |
| 14° 25.00' N                                        | 16° 58.00' W     | 10.9         | 77.1          | 1.8          | 1.7           | 1.1           | 7.5           | (Orange et al., 1993)    | Aerosol Dust    |
| 13° 23.00' N                                        | 2° 28.00' E      | 14.0         | 74.3          | 2.3          | 0.6           | 1.9           | 7.0           | (Moreno et al., 2006)    | Aerosol Dust    |
| 13° 23.00' N                                        | 2° 28.00' E      | 14.3         | 69.4          | 3.3          | 2.6           | 1.5           | 8.9           | (Moreno et al., 2006)    | Aerosol Dust    |
| 12° 00.00' N                                        | 8° 31.00' E      | 15.1         | 63.1          | 5.8          | 6.1           | 1.2           | 8.7           | (Wilke et al., 1984)     | Aerosol Dust    |
| 12° 00.00' N                                        | 8° 31.00' E      | 14.3         | 66.0          | 5.7          | 5.1           | 1.2           | 7.7           | (Wilke et al., 1984)     | Aerosol Dust    |
| 12° 00.00' N                                        | 8° 31.00' E      | 13.7         | 72.1          | 4.0          | 1.9           | 1.0           | 7.3           | (Orange and Gac, 1990)   | Aerosol Dust    |
| 11° 04.00' N                                        | 7° 42.00' E      | 13.8         | 65.9          | 6.6          | 5.0           | 1.2           | 7.4           | (Wilke et al., 1984)     | Aerosol Dust    |
| 11° 04.00' N                                        | 7° 42.00' E      | 12.4         | 71.2          | 5.7          | 3.2           | 1.3           | 6.2           | (Wilke et al., 1984)     | Aerosol Dust    |
| 10° 07.00' N                                        | 14° 22.00' E     | 11.7         | 71.8          | 2.5          | 6.7           | 0.7           | 6.5           | (Nguetnkam et al., 2008) | Soil            |
| 10° 07.00' N                                        | 14° 22.00' E     | 14.5         | 69.0          | 2.3          | 5.0           | 1.0           | 8.2           | (Nguetnkam et al., 2008) | Soil            |
|                                                     | <b>Mean</b>      | <b>13.1</b>  | <b>69.1</b>   | <b>3.5</b>   | <b>5.4</b>    | <b>1.2</b>    | <b>7.7</b>    |                          |                 |
|                                                     | <b>Std Dev.</b>  | <b>2.4</b>   | <b>6.3</b>    | <b>1.4</b>   | <b>7.0</b>    | <b>0.3</b>    | <b>1.2</b>    |                          |                 |

| River end-member: Senegal River suspension |                 |             |             |            |            |            |             |                      |                          |
|--------------------------------------------|-----------------|-------------|-------------|------------|------------|------------|-------------|----------------------|--------------------------|
| Latitude                                   | Longitude       | Al(%)       | Si (%)      | K (%)      | Ca (%)     | Ti (%)     | Fe (%)      | Reference            | Material                 |
| 16°02' N                                   | 16°30' W        | 28.4        | 51.2        | 3.6        | 0.5        | 1.3        | 15.0        | (Gac and Kane, 1986) | Senegal River suspension |
| 16°02' N                                   | 16°30' W        | 28.1        | 51.5        | 3.2        | 0.5        | 1.2        | 15.4        | (Gac and Kane, 1986) | Senegal River suspension |
| 16°02' N                                   | 16°30' W        | 27.9        | 52.9        | 2.9        | 0.3        | 1.3        | 14.7        | (Gac and Kane, 1986) | Senegal River suspension |
| 16°02' N                                   | 16°30' W        | 28.9        | 51.3        | 3.0        | 0.3        | 1.2        | 15.3        | (Gac and Kane, 1986) | Senegal River suspension |
| 16°02' N                                   | 16°30' W        | 28.1        | 52.7        | 3.0        | 0.3        | 1.2        | 14.7        | (Gac and Kane, 1986) | Senegal River suspension |
| 16°02' N                                   | 16°30' W        | 27.5        | 52.7        | 3.1        | 0.3        | 1.2        | 15.2        | (Gac and Kane, 1986) | Senegal River suspension |
| 16°02' N                                   | 16°30' W        | 28.1        | 52.3        | 3.2        | 0.5        | 1.2        | 14.7        | (Gac and Kane, 1986) | Senegal River suspension |
| 16°02' N                                   | 16°30' W        | 27.1        | 52.4        | 3.2        | 0.8        | 1.2        | 15.2        | (Gac and Kane, 1986) | Senegal River suspension |
| 16°02' N                                   | 16°30' W        | 29.2        | 50.6        | 3.1        | 0.3        | 1.1        | 15.8        | (Gac and Kane, 1986) | Senegal River suspension |
| 16°02' N                                   | 16°30' W        | 29.4        | 50.7        | 3.1        | 0.3        | 1.1        | 15.4        | (Gac and Kane, 1986) | Senegal River suspension |
|                                            | <b>Mean</b>     | <b>28.3</b> | <b>51.8</b> | <b>3.1</b> | <b>0.4</b> | <b>1.2</b> | <b>15.1</b> |                      |                          |
|                                            | <b>Std Dev.</b> | <b>0.7</b>  | <b>0.9</b>  | <b>0.2</b> | <b>0.2</b> | <b>0.1</b> | <b>0.4</b>  |                      |                          |

  

| Marine end-member |       |        |       |        |        |        |                                              |  |
|-------------------|-------|--------|-------|--------|--------|--------|----------------------------------------------|--|
|                   | Al(%) | Si (%) | K (%) | Ca (%) | Ti (%) | Fe (%) | Reference                                    |  |
| GeoB7920-2        | 0     | 4 ± 2  | 0     | 96 ± 2 | 0      | 0      | (Mulitza et al., 2010; Collins et al., 2011) |  |
| GeoB9508-5        | 0     | 16 ± 6 | 0     | 84 ± 6 | 0      | 0      | (Mulitza et al., 2010; Collins et al., 2011) |  |
| GeoB9526-5        | 0     | 29 ± 9 | 0     | 71 ± 9 | 0      | 0      | (Mulitza et al., 2010; Collins et al., 2011) |  |
| GeoB9528-3        | 0     | 9 ± 2  | 0     | 91 ± 2 | 0      | 0      | (Mulitza et al., 2010; Collins et al., 2011) |  |

- Collins, J.A., Schefuß, E., Heslop, D., Mulitza, S., Prange, M., Zabel, M., Tjallingii, R., Dokken, T.M., Huang, E., Mackensen, A., Schulz, M., Tian, J., Zarriss, M., and Wefer, G.: Interhemispheric symmetry of the tropical African rainbelt over the past 23,000 years, *Nature Geoscience*, 4, 42-45, 2010.
- Gac, J.Y., Kane, A.: Le fleuve Sénégal: I. Bilan hydrologique et flux continentaux de matières particulaires à l'embouchure, *Sciences Géologiques Bulletin*, 39, 99-130, 1986.
- Guieu, C., and Thomas, A.J.: Saharan aerosols: from the soil to the ocean, in: *The impact of desert dust across the Mediterranean*, Kluwer Academic Publishers, Dordrecht, The Netherlands, 207-216, 1996.
- Moreno, T., Querol, X., Castillo, S., Alastuey, A., Cuevas, E., Herrmann, L., Mounkaila, M., Elvira, J., Gibbons, W.: Geochemical variations in aeolian mineral particles from the Sahara-Sahel Dust Corridor, *Chemosphere*, 65, 261-270, 2006.
- Mulitza, S., Heslop, D., Pittauerova, D., Fischer, H. W., Meyer, I., Stuut, J-B., Zabel, M., Mollenhauer, G., Collins, J. A., Kuhnert, H., Schulz, M.: Increase in African dust flux at the onset of commercial agriculture in the Sahel region. *Nature* 466, 226-228, 2010.
- Nguetnkam, J.P., Kamga, R., Villiéras, F., Ekodeck, G.E., and Yvon, J.: Altération différentielle du granite en zone tropicale. Exemple de deux séquences étudiées au Cameroun (Afrique centrale). *Comptes Rendus Geosciences*, 340, 451-461, 2008.
- Orange, D., and Gac, J.Y.: Bilan géochimique des apports atmosphériques en domaines sahélien et soudano-guinéen d'Afrique de l'Ouest (bassins supérieurs du Sénégal et de la Gambie), *Géodynamique*, 5, 51-65, 1990.
- Orange, D., Gac, J.Y., and Diallo, M.I.: Geochemical assessment of atmospheric deposition including Harmattan dust in continental west Africa, *Tracers in Hydrology (Proceedings of the Yokohama Symposium, July 1993)*, IAMS Publ. no. 215, 303-312, 1993.
- Wilke, B.M., Duke, B.J., and Jimoh, W.L.O.: Mineralogy and chemistry of Harmattan dust in Northern Nigeria, *Catena*, 11, 91-96, 1984.

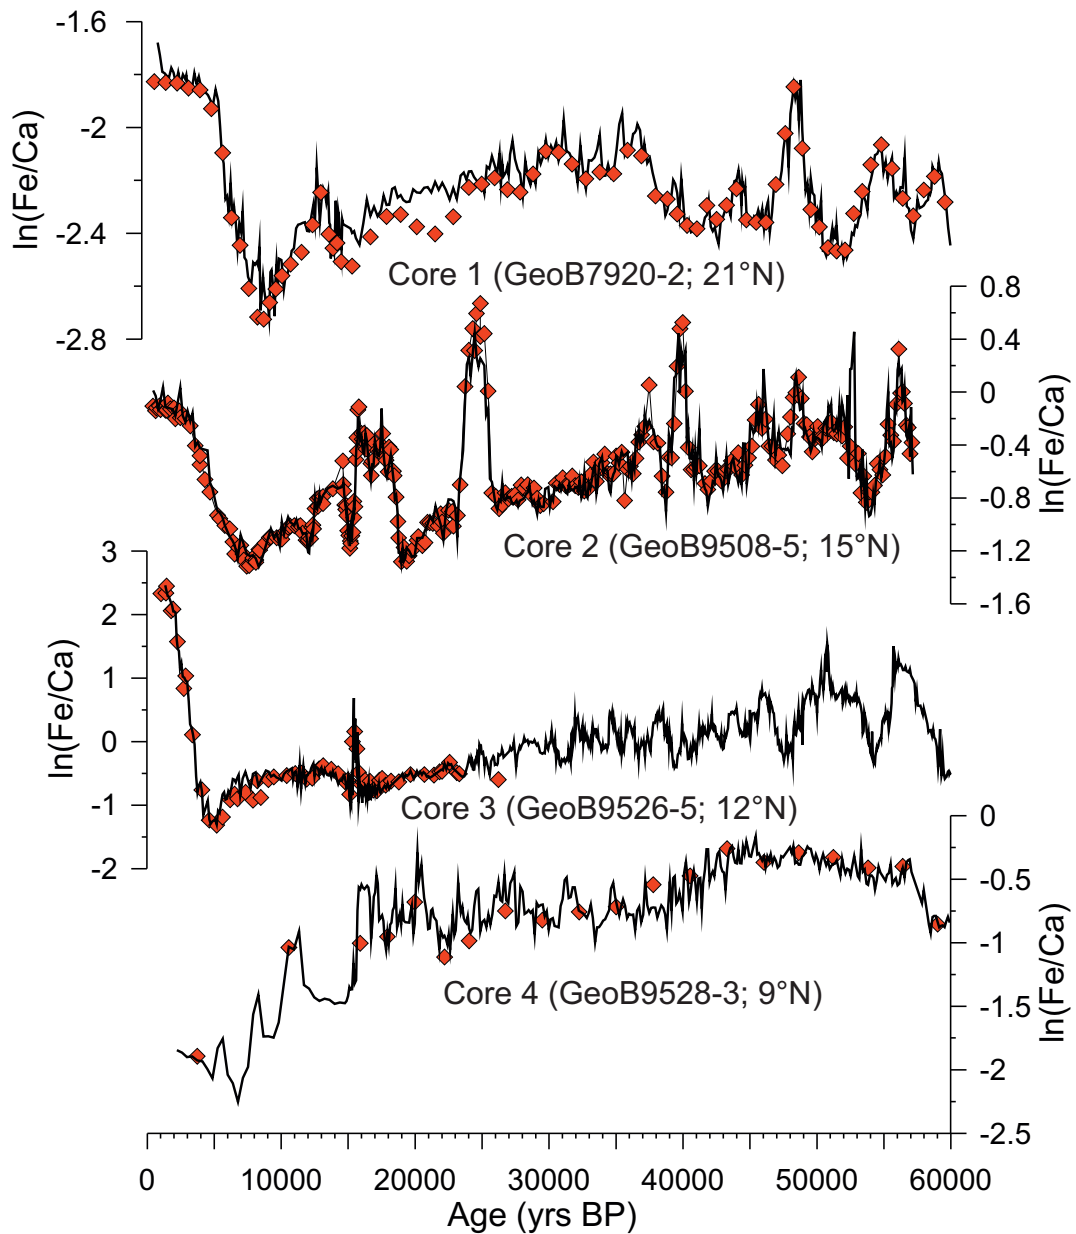

**Supplementary Figure 1. Fit of the calibrated scanner data with the discrete powder samples.** Calibrated scanner data (black line) and EDP-XRF powder data (red diamonds) plotted against age. The calibration regresses the scanner data against the powder data for all element log-ratios (with Ca as the denominator). Mean  $r^2$  values for all the log(element/Ca) regressions are: 0.74 (GeoB7920-2), 0.91 (GeoB9508-5), 0.95 (GeoB9526-5) and 0.93 (GeoB9528-3). Although the discrete powder samples do not cover the entire core for GeoB9526-5, they cover the most extreme sediment compositions, as recommended by Weltje and Tjallingii (2008). As such, any additional powder samples would be unlikely to modify the calibrated scanner data. For core GeoB9528-3 the full core is calibrated using 50 samples covering the entire core (although only 20 cover this section of the core). Again, any additional samples would be unlikely to change the calibrated data.

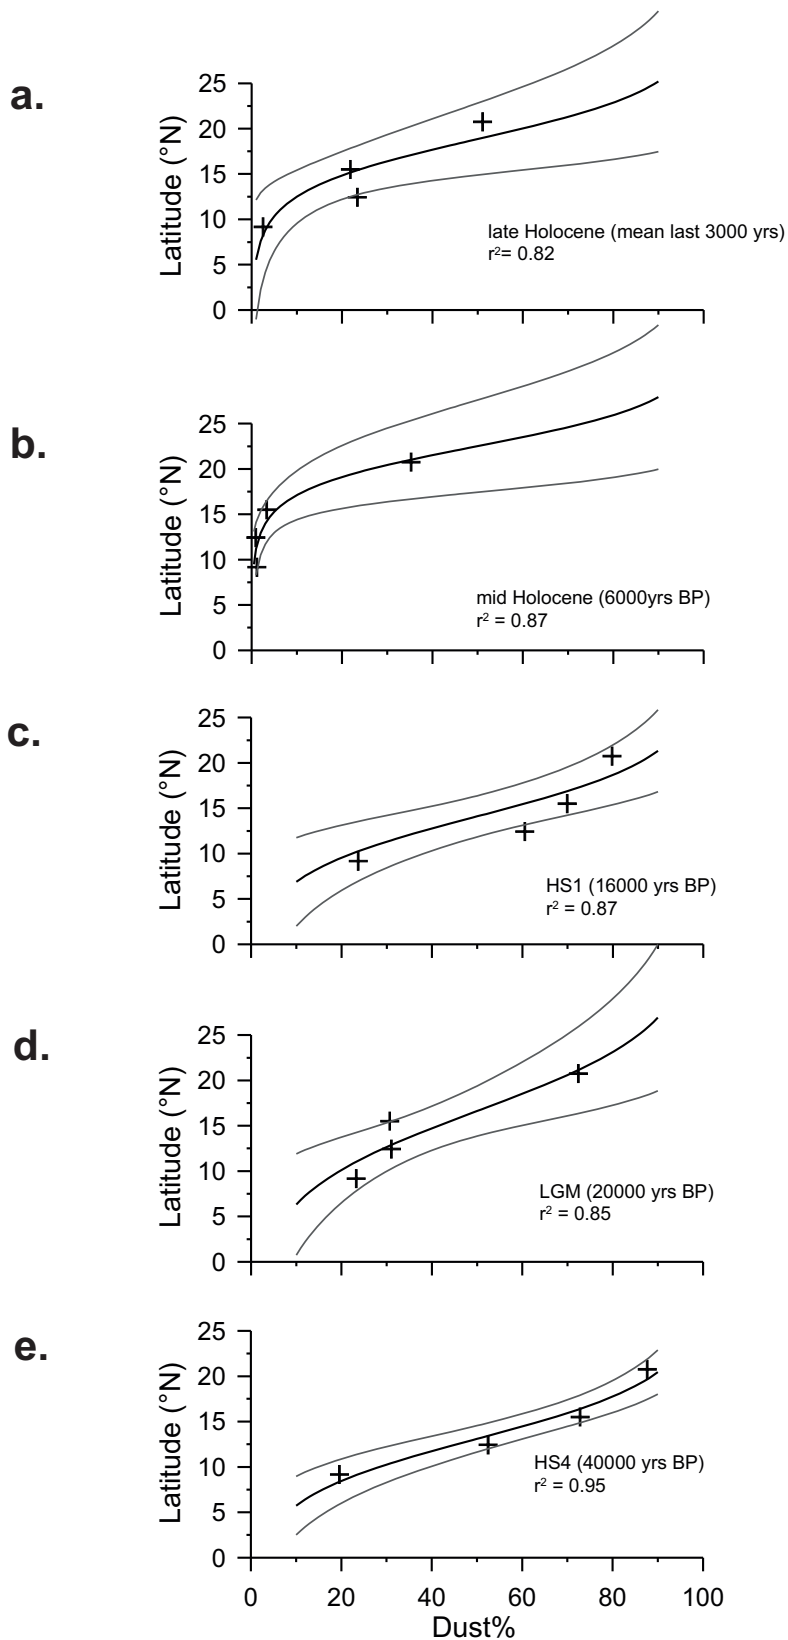

**Supplementary Figure 2. Linear regression of dust% and latitude for past timeslices. (a)** Late Holocene (mean of last 3000 yrs). **(b)** mid Holocene (timestep at 6000 yrs BP). **(c)** Heinrich Stadial 1 (timestep at 16000 yrs BP). **(d)** Last Glacial Maximum (timestep at 23000 yrs BP). **(e)** Heinrich Stadial 4 (timestep at 40000 yrs BP). Crosses mark sediment Cores 1-4. Black lines represent robust linear regression. Data have been transformed as  $\log((100-\text{dust\%})/\text{dust\%})$  so that the regression lies in the interval (0, 100). Grey lines represent 68% confidence intervals. Regression is plotted between 0.5-90% dust for (a)-(b) and 10-90% dust for (c)-(e).

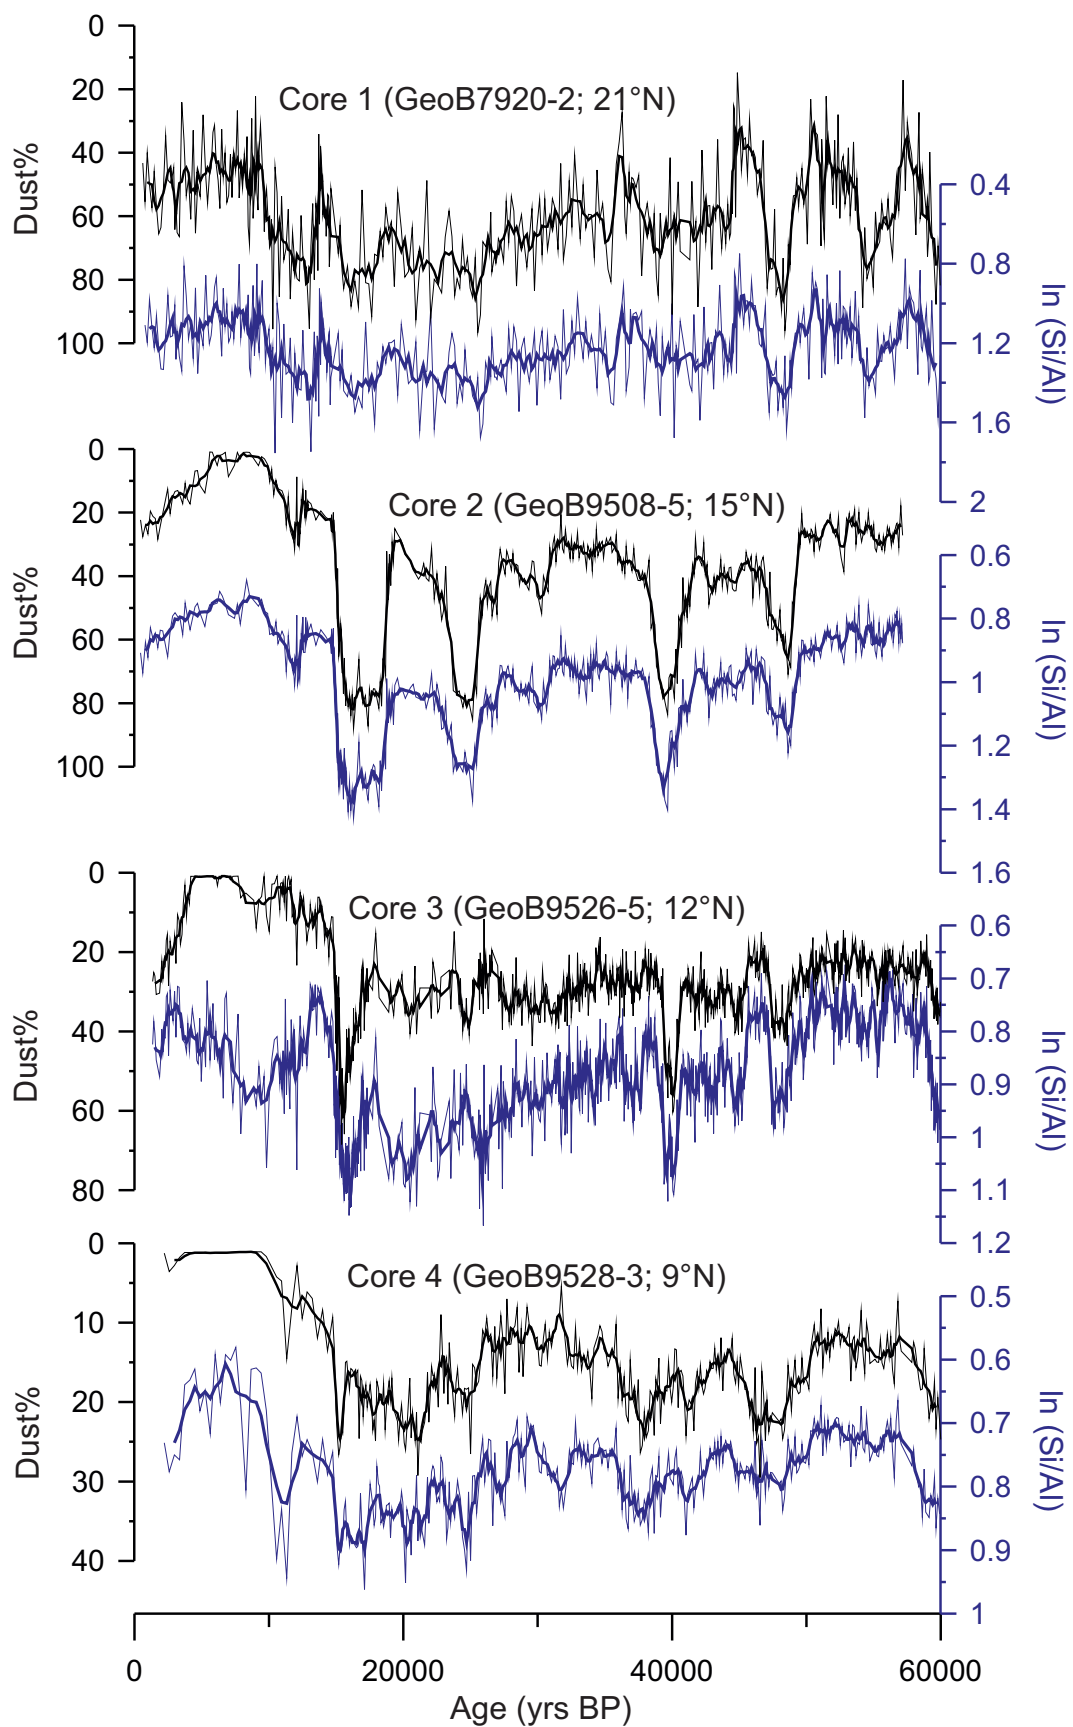

**Supplementary Figure 3.** Dust% and ln(Si/Al) ratios for the last 60ka for sediment cores 1-4.
